# Supplementary material for: Reduction in paediatric intensive care admissions during COVID-19 lockdown in Maryland, USA
Source: PubMed Central journal article supplement — BMJ Paediatr Open. 2020 Nov 3;4(1):e000876. doi: 10.1136/bmjpo-2020-000876 (PMC7640529; doi:10.1136/bmjpo-2020-000876), 2020-11-03

# BMJ Paediatrics Open

BMJ Paediatrics Open is committed to open peer review. As part of this commitment we make the peer review history of every article we publish publicly available.

When an article is published we post the peer reviewers' comments and the authors' responses online. We also post the versions of the paper that were used during peer review. These are the versions that the peer review comments apply to.

The versions of the paper that follow are the versions that were submitted during the peer review process. They are not the versions of record or the final published versions. They should not be cited or distributed as the published version of this manuscript.

BMJ Paediatrics Open is an open access journal and the full, final, typeset and author-corrected version of record of the manuscript is available on our site with no access controls, subscription charges or pay-per-view fees (<http://bmjpaedsopen.bmj.com>).

If you have any questions on BMJ Paediatrics Open's open peer review process please email [info.bmjpo@bmj.com](mailto:info.bmjpo@bmj.com)

# BMJ Paediatrics Open

## Impact of non-pharmaceutical interventions against COVID-19 on admissions to a pediatric intensive care unit in Maryland, USA

|                               |                                                                                                                                                                                                                                                                    |
|-------------------------------|--------------------------------------------------------------------------------------------------------------------------------------------------------------------------------------------------------------------------------------------------------------------|
| Journal:                      | <i>BMJ Paediatrics Open</i>                                                                                                                                                                                                                                        |
| Manuscript ID                 | bmjpo-2020-000876                                                                                                                                                                                                                                                  |
| Article Type:                 | Original research letter                                                                                                                                                                                                                                           |
| Date Submitted by the Author: | 18-Sep-2020                                                                                                                                                                                                                                                        |
| Complete List of Authors:     | Graciano, Ana Lia; University of Maryland School of Medicine, Pediatrics/Critical Care<br>Bhutta, Adnan; University of Maryland School of Medicine, Pediatrics/Critical Care<br>Custer, Jason; University of Maryland School of Medicine, Pediatrics/Critical Care |
| Keywords:                     | Epidemiology, Health services research, Virology                                                                                                                                                                                                                   |
|                               |                                                                                                                                                                                                                                                                    |

SCHOLARONE™  
Manuscripts

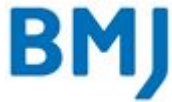

I, the Submitting Author has the right to grant and does grant on behalf of all authors of the Work (as defined in the below author licence), an exclusive licence and/or a non-exclusive licence for contributions from authors who are: i) UK Crown employees; ii) where BMJ has agreed a CC-BY licence shall apply, and/or iii) in accordance with the terms applicable for US Federal Government officers or employees acting as part of their official duties; on a worldwide, perpetual, irrevocable, royalty-free basis to BMJ Publishing Group Ltd ("BMJ") its licensees and where the relevant Journal is co-owned by BMJ to the co-owners of the Journal, to publish the Work in this journal and any other BMJ products and to exploit all rights, as set out in our [licence](#).

The Submitting Author accepts and understands that any supply made under these terms is made by BMJ to the Submitting Author unless you are acting as an employee on behalf of your employer or a postgraduate student of an affiliated institution which is paying any applicable article publishing charge ("APC") for Open Access articles. Where the Submitting Author wishes to make the Work available on an Open Access basis (and intends to pay the relevant APC), the terms of reuse of such Open Access shall be governed by a Creative Commons licence – details of these licences and which [Creative Commons](#) licence will apply to this Work are set out in our licence referred to above.

Other than as permitted in any relevant BMJ Author's Self Archiving Policies, I confirm this Work has not been accepted for publication elsewhere, is not being considered for publication elsewhere and does not duplicate material already published. I confirm all authors consent to publication of this Work and authorise the granting of this licence.

1  
2  
3 **Impact of non-pharmaceutical interventions against COVID-19 on admissions to a pediatric**  
4 **intensive care unit in the state of Maryland, USA**  
5

6 **Ana Lia Graciano, Adnan T. Bhutta, Jason Custer**  
7  
8  
9

10 **Corresponding author:**

11 **Ana Lia Graciano, MD, FAAP, FCCM**

12 Professor of Pediatrics

13 Pediatric Critical Care Medicine

14 University of Maryland Children's Hospital

15 University of Maryland School of Medicine

16 110 S Paca St. 8<sup>th</sup> floor

17 Baltimore, MD 21201

18 Phone: +1 410 328-6957

19 Fax: +1 410 328-0680

20 Email: [agraciano@som.umaryland.edu](mailto:agraciano@som.umaryland.edu)  
21  
22  
23  
24  
25

26 **Co-Authors**

27 **Adnan T. Bhutta, MBBS**

28 Professor of Pediatrics

29 Pediatric Critical Care Medicine

30 University of Maryland Children's Hospital

31 Baltimore, Maryland

32 USA  
33  
34  
35

36 **Jason C Custer, MD**

37 Associate Professor

38 Pediatric Critical Care Medicine

39 University of Maryland Children's Hospital

40 Baltimore, Maryland

41 USA  
42  
43  
44  
45

46 **Keywords: children, critical care, respiratory infections, COVID-19, epidemiology**  
47  
48  
49

50 **Word count: 732**  
51  
52  
53

54 **Funding:** This research received no specific grant from any funding agency in the public,  
55 commercial or not-for-profit sector  
56  
57  
58  
59  
60

1  
2  
3  
4  
5 **Competing interest: none**  
6  
7

8  
9 **Patient Consent for Publication: not required**  
10

11  
12 **Contributor statement**

13 AB, JC and ALG contributed to the conception and design of the study. ALG and AB contributed  
14 to data analysis and interpretation of the results. AG drafted the manuscript. All authors  
15 contributed to the interpretation of the results. All authors had full access to the data and take  
16 responsibility for the integrity and accuracy of the analysis. All authors read, contributed to and  
17 approved the final manuscript  
18  
19  
20  
21  
22  
23  
24  
25  
26  
27  
28  
29  
30  
31  
32  
33  
34  
35  
36  
37  
38  
39  
40  
41  
42  
43  
44  
45  
46  
47  
48  
49  
50  
51  
52  
53  
54  
55  
56  
57  
58  
59  
60

To the Editor,

The global COVID-19 pandemic caused by SARS-CoV-2 virus has led to a reduction in the number of adult patients being admitted for common conditions.(1) As in other locales, the state of Maryland implemented a series of non-pharmacologic interventions beginning on March 5, 2020. Public transportation was sharply curtailed, social distancing was encouraged and schools were closed for the balance of the school year. With the implementation of these interventions, we have observed a striking decline in admissions to our pediatric intensive care unit (PICU).

The University of Maryland (UM) Health System is a health-care system aligned with the University of Maryland School of Medicine with its main hospital in downtown Baltimore and ten sister hospitals throughout the state. The Pediatric Intensive Care Unit (PICU) based at the Children's Hospital (UMCH) in Baltimore is a 19-bed mixed unit that serves as a referral center throughout the state. We queried the UMCH data entered in the Virtual PICU System, (VPS) LLC. This database contains clinical data on all children admitted to our PICU. We examined admissions between March 1<sup>st</sup> and May 31<sup>st</sup> 2020 and compared them with the same time period during 2016-2019. Patients were identified by most common admitting categories.

Between March 1<sup>st</sup> and May 31<sup>st</sup>, 2020 there were 101 PICU admissions, reflecting a decrease of 48.2 % when compared with the same period during 2019 (n=195) and a decrease of almost 70 % when compared with 2016-2018. When collated by the most frequent admitting diagnosis, the decline in total admissions was due to a decrease in respiratory illnesses. Furthermore, 87% of the respiratory admissions in 2020 occurred in March with only one respiratory admission in May in a child with chronic lung disease and ventilator dependency. Admissions associated with other common pediatric diagnoses such as congenital heart disease or diabetic ketoacidosis remained at the usual rate. Table 1 shows the number of admissions based on the most common categories (A) and a breakdown of the respiratory diagnosis (B). During the study period there were a total of 283 status asthmaticus admissions from which only six (2%) occurred during March-May 2020. Similar trends are seen for bronchiolitis and pneumonia admissions.

Governments around the world instituted a variety of interventions to "flatten the curve" during the pandemic. The government of Maryland instituted similar stepwise measures including closure of schools and non-essential businesses and institution of stay at home orders. Viral respiratory tract infections are the leading cause of pediatric intensive care unit admissions, representing an enormous economic and disease burden.(2) Transmission of respiratory viruses is complex and depends on many variables such as environmental factors, crowding, and host response. Schools and day care centers are major sources of common viral infections and children attending day care are at higher risk of having respiratory tract infections than those staying at home.(3) The temporal association of reduction in PICU admissions from acute respiratory illnesses and closure of schools and daycare centers is certainly clear.

1  
2  
3 An unexpected benefit of the non-pharmaceutical interventions has been an improvement in  
4 air quality which could certainly be an additional factor in the dramatic reduction of pediatric  
5 asthma admissions.(4,5) Studies have shown that during lockdown air quality was significantly  
6 improved. In urban areas nitrogen dioxide (NO<sub>2</sub>) and carbon monoxide are mainly emitted from  
7 combustion sources, particularly diesel and, gasoline engines, manufacturing industry and  
8 power plants. During the lockdown period all of these sectors had reduced operation,  
9 contributing to a decrease in environmental pollutants.(6) NASA satellite images show a  
10 dramatic drop in air pollution during the lockdown period compared to previous years. March  
11 2020 showed the lowest NO<sub>2</sub> monthly atmospheric level of any March since 2015 (Figure 1).  
12  
13  
14

15 While the human and economic costs of the COVID-19 pandemic are devastating, we are  
16 witnessing a significant decrease in the number of PICU admissions, especially those resulting  
17 from respiratory illnesses. It is unclear if this is a temporary reduction or whether this will last  
18 for a longer period as the use of virtual learning and social distancing is encouraged and  
19 renewed emphasis on hand hygiene is incorporated into daily routines. We remain concerned  
20 though that children may not be brought in to seek appropriate medical attention due to the  
21 anxiety related to visiting a health care facility during the pandemic. If that is indeed the case,  
22 then it can certainly have profound short-term and long-term effects on the health of these  
23 children.  
24  
25  
26  
27  
28

## 29 References

- 30  
31  
32 1. Kansagra AP, Goyal MS, Hamilton S, Albers GW. Collateral Effect of Covid-19 on  
33 Stroke Evaluation in the United States. *N Engl J Med*. 2020 Jul 23;383(4):400–1.  
34  
35
- 36  
37 2. Chauhan JC, Slamon NB. The Impact of Multiple Viral Respiratory Infections on  
38 Outcomes for Critically Ill Children. *Pediatr Crit Care Med*. 2017 Aug;18(8):e333–8.  
39  
40
- 41  
42 3. Domínguez Aurrecoechea B, Fernández Francés M, Ordóñez Alonso MÁ, López  
43 Vilar P, Pérez Candás JI, Merino Ramos L, et al. [Infectious diseases and use of  
44 health care resources in children less than 2 years-old who attend kindergarten]. *An*  
45 *Pediatr (Barc)*. 2015 Sep;83(3):149–59.  
46  
47
- 48  
49 4. Yu H-R, Lin C-HR, Tsai J-H, Hsieh Y-T, Tsai T-A, Tsai C-K, et al. A Multifactorial  
50 Evaluation of the Effects of Air Pollution and Meteorological Factors on Asthma  
51 Exacerbation. *Int J Environ Res Public Health*. 2020 Jun 4;17(11).  
52  
53  
54  
55  
56  
57  
58  
59  
60

- 1  
2  
3  
4 5. Crow SS, Undavalli C, Warner DO, Katusic SK, Kandel P, Murphy SL, et al.  
5 Epidemiology of Pediatric Critical Illness in a Population-Based Birth Cohort in  
6 Olmsted County, MN. *Pediatr Crit Care Med*. 2017 Mar;18(3):e137–45.  
7  
8  
9  
10 6. Mahato S, Pal S, Ghosh KG. Effect of lockdown amid COVID-19 pandemic on air  
11 quality of the megacity Delhi, India. *Sci Total Environ*. 2020 Aug 15;730:139086.  
12  
13

14 **Table 1. PICU Admissions March 1<sup>st</sup>-May 31<sup>st</sup>, 2016-2020**

15  
16  
17 **A- Admissions March 1<sup>st</sup>-May 31<sup>st</sup>, 2016-2020 (most common categories)**

| Category       | 2016       | 2017       | 2018       | 2019       | 2020       |
|----------------|------------|------------|------------|------------|------------|
| Respiratory    | 138        | 177        | 133        | 106        | 30         |
| Cardiovascular | 51         | 34         | 47         | 57         | 56         |
| Endocrine      | 12         | 12         | 14         | 8          | 7          |
| Neurologic     | 25         | 16         | 21         | 5          | 6          |
| Other          | 73         | 70         | 60         | 19         | 2          |
| <b>Total</b>   | <b>299</b> | <b>309</b> | <b>275</b> | <b>195</b> | <b>101</b> |

18  
19  
20  
21  
22  
23  
24  
25  
26  
27  
28  
29  
30  
31  
32  
33  
34  
35  
36  
37  
38  
39  
40  
41  
42  
43 **B-Respiratory diagnosis, March 1<sup>st</sup>-May 31<sup>st</sup>, 2016-2020**

| Respiratory Diagnosis | 2016 | 2017 | 2018 | 2019 | 2020 | Total |
|-----------------------|------|------|------|------|------|-------|
| Status asthmaticus    | 76   | 81   | 72   | 51   | 6    | 286   |
| Bronchiolitis         | 24   | 39   | 31   | 29   | 8    | 131   |



|                   |            |            |            |            |           |            |
|-------------------|------------|------------|------------|------------|-----------|------------|
| <b>Pneumonia</b>  | 24         | 25         | 14         | 15         | 4         | 82         |
| <b>Croup</b>      | 5          | 8          | 1          | 4          | 0         | 18         |
| <b>Tracheitis</b> | 3          | 9          | 7          | 3          | 3         | 25         |
| <b>Other*</b>     | 6          | 15         | 8          | 4          | 9         | 42         |
| <b>Total</b>      | <b>138</b> | <b>177</b> | <b>133</b> | <b>106</b> | <b>30</b> | <b>584</b> |

\*Other: acute chest syndrome, congenital lung malformation, obstructive sleep apnea, subglottic cyst, subglottic stenosis, aspiration pneumonitis, asphyxia.

### Figure 1

NASA satellite measurements revealed significant reductions in air pollution over major metropolitan areas of the Northeast United States

**Panel A:** average NO<sub>2</sub> concentrations in March 2015-2019.

**Panel B:** average NO<sub>2</sub> concentrations in March 2020 during the strict lockdown period.

Source:

NASA Aura: <https://aura.gsfc.nasa.gov>

1  
2  
3  
4  
5  
6  
7  
8  
9  
10  
11  
12  
13  
14  
15  
16  
17  
18  
19  
20  
21  
22  
23  
24  
25  
26  
27  
28  
29  
30  
31  
32  
33  
34  
35  
36  
37  
38  
39  
40  
41  
42  
43  
44  
45  
46  
47  
48  
49  
50  
51  
52  
53  
54  
55  
56  
57  
58  
59  
60

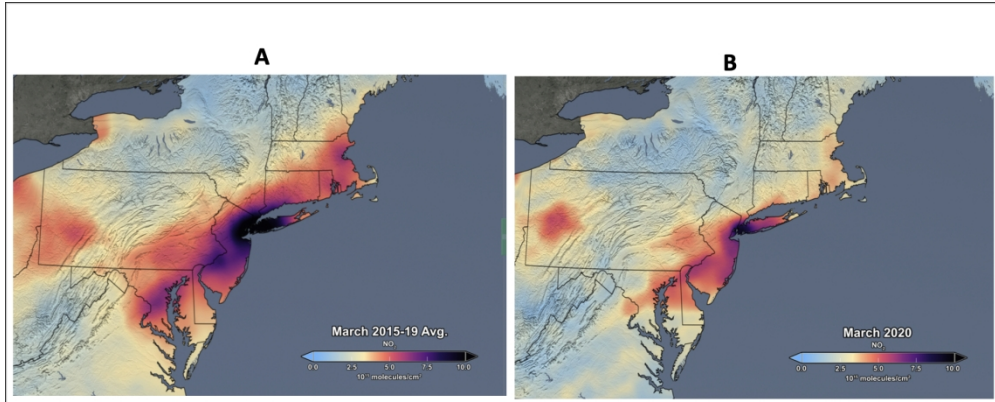

# BMJ Paediatrics Open

## Reduction in paediatric intensive care admissions during COVID-19 lockdown in Maryland, USA

|                               |                                                                                                                                                                                                                                                                    |
|-------------------------------|--------------------------------------------------------------------------------------------------------------------------------------------------------------------------------------------------------------------------------------------------------------------|
| Journal:                      | <i>BMJ Paediatrics Open</i>                                                                                                                                                                                                                                        |
| Manuscript ID                 | bmjpo-2020-000876.R1                                                                                                                                                                                                                                               |
| Article Type:                 | Original research letter                                                                                                                                                                                                                                           |
| Date Submitted by the Author: | 20-Oct-2020                                                                                                                                                                                                                                                        |
| Complete List of Authors:     | Graciano, Ana Lia; University of Maryland School of Medicine, Pediatrics/Critical Care<br>Bhutta, Adnan; University of Maryland School of Medicine, Pediatrics/Critical Care<br>Custer, Jason; University of Maryland School of Medicine, Pediatrics/Critical Care |
| Keywords:                     | Epidemiology, Health services research, Virology                                                                                                                                                                                                                   |
|                               |                                                                                                                                                                                                                                                                    |

SCHOLARONE™  
Manuscripts



I, the Submitting Author has the right to grant and does grant on behalf of all authors of the Work (as defined in the below author licence), an exclusive licence and/or a non-exclusive licence for contributions from authors who are: i) UK Crown employees; ii) where BMJ has agreed a CC-BY licence shall apply, and/or iii) in accordance with the terms applicable for US Federal Government officers or employees acting as part of their official duties; on a worldwide, perpetual, irrevocable, royalty-free basis to BMJ Publishing Group Ltd ("BMJ") its licensees and where the relevant Journal is co-owned by BMJ to the co-owners of the Journal, to publish the Work in this journal and any other BMJ products and to exploit all rights, as set out in our [licence](#).

The Submitting Author accepts and understands that any supply made under these terms is made by BMJ to the Submitting Author unless you are acting as an employee on behalf of your employer or a postgraduate student of an affiliated institution which is paying any applicable article publishing charge ("APC") for Open Access articles. Where the Submitting Author wishes to make the Work available on an Open Access basis (and intends to pay the relevant APC), the terms of reuse of such Open Access shall be governed by a Creative Commons licence – details of these licences and which [Creative Commons](#) licence will apply to this Work are set out in our licence referred to above.

Other than as permitted in any relevant BMJ Author's Self Archiving Policies, I confirm this Work has not been accepted for publication elsewhere, is not being considered for publication elsewhere and does not duplicate material already published. I confirm all authors consent to publication of this Work and authorise the granting of this licence.

1  
2  
3 **Reduction in paediatric intensive care admissions during COVID-19 lockdown in Maryland,**  
4 **USA**  
5  
6

7 **Ana Lia Graciano, Adnan T. Bhutta, Jason Custer**  
8  
9

10  
11  
12 **Corresponding author:**

13 **Ana Lia Graciano, MD, FAAP, FCCM**

14 Professor of Pediatrics

15 Pediatric Critical Care Medicine

16 University of Maryland Children's Hospital

17 University of Maryland School of Medicine

18 110 S Paca St. 8<sup>th</sup> floor

19 Baltimore, MD 21201

20 Phone: +1 410 328-6957

21 Fax: +1 410 328-0680

22 Email: [agraciano@som.umaryland.edu](mailto:agraciano@som.umaryland.edu)  
23  
24  
25  
26

27 **Co-Authors**

28 **Adnan T. Bhutta, MBBS**

29 Professor of Pediatrics

30 Pediatric Critical Care Medicine

31 University of Maryland Children's Hospital

32 Baltimore, Maryland

33 USA  
34  
35  
36

37 **Jason C Custer, MD**

38 Associate Professor

39 Pediatric Critical Care Medicine

40 University of Maryland Children's Hospital

41 Baltimore, Maryland

42 USA  
43  
44  
45  
46

47 **Keywords: children, critical care, respiratory infections, COVID-19, epidemiology**  
48  
49  
50

51 **Word count: 600**  
52  
53  
54  
55  
56  
57  
58  
59  
60

1  
2  
3 **Funding:** This research received no specific grant from any funding agency in the public,  
4 commercial or not-for-profit sector  
5  
6  
7

8 **Competing interest: none**  
9

10  
11  
12 **Patient Consent for Publication: not required**  
13  
14  
15

16 **Contributor statement**

17 AB, JC and ALG contributed to the conception and design of the study. ALG and AB contributed  
18 to data analysis and interpretation of the results. AG drafted the manuscript. All authors  
19 contributed to the interpretation of the results. All authors had full access to the data and take  
20 responsibility for the integrity and accuracy of the analysis. All authors read, contributed to and  
21 approved the final manuscript  
22  
23  
24  
25  
26  
27  
28  
29  
30  
31  
32  
33  
34  
35  
36  
37  
38  
39  
40  
41  
42  
43  
44  
45  
46  
47  
48  
49  
50  
51  
52  
53  
54  
55  
56  
57  
58  
59  
60

**Abstract**

As a public health measure during the COVID-19 pandemic, governments around the world instituted a variety of interventions to “flatten the curve”. The government of Maryland instituted similar measures. We observed a striking decline in PICU admissions during that period, mostly due to a decreased in respiratory infections. We believe this decline is multifactorial: less person-to-person contact, better air quality and perhaps “fear” of going to a hospital during the pandemic. We report an analysis of our PICU admissions during the lockdown period and compared them with the same time period during the four previous years.

Confidential: For Review Only

**To the Editor,**

The global COVID-19 pandemic caused by SARS-CoV-2 virus has led to a reduction in the number of adult patients being admitted for common conditions.(1) The state of Maryland implemented a series of interventions on March 5, 2020. Public transportation was sharply curtailed, social distancing was encouraged and schools were closed for the balance of the school year. We observed a striking decline in pediatric intensive care unit (PICU) admissions during this period.

The PICU at the University of Maryland Children's Hospital (UMCH) in Baltimore is a 19-bed mixed unit that serves as a referral center throughout the state. We examined PICU admissions between March 1<sup>st</sup> and May 31<sup>st</sup> 2020, using the UMCH database and compared them with the same time period during 2015-2019. Patients were identified by most common admitting categories.

Between March 1<sup>st</sup> and May 31<sup>st</sup>, 2020 there were 101 PICU admissions, reflecting a decrease of 48.2 % when compared with the same period during 2019 (n=195) and a decrease of almost 70 % when compared with 2015-2018. When collated by the most frequent admitting diagnosis, the decline in total admissions was due to a decrease in respiratory illnesses. Furthermore, 87% of the respiratory admissions in 2020 occurred in March with only one respiratory admission in May in a child with chronic lung disease and ventilator dependency. Admissions associated with other common pediatric diagnoses such as congenital heart disease or diabetic ketoacidosis remained at the usual rate. During the study period there were a total of 355 status asthmaticus admissions from which only six (1.7%) occurred during March-May 2020. Similar trends are seen for bronchiolitis and pneumonia admissions. (Table 1 A and B)

Governments around the world instituted a variety of interventions to "flatten the curve" during the pandemic. Viral respiratory tract infections are the leading cause of admissions. (2) Transmission of respiratory viruses is complex and depends on many variables such as environmental factors, crowding, and host response. Schools and day care centers are major sources of common viral infections and children attending day care are at higher risk of having respiratory tract infections than those staying at home.(3) The temporal association of reduction in PICU admissions from acute respiratory illnesses and closure of schools and daycare centers is certainly clear.

An unexpected benefit of the interventions has been an improvement in air quality which could certainly be an additional factor in the dramatic reduction of pediatric asthma admissions.(4,5) In urban areas nitrogen dioxide (NO<sub>2</sub>) and carbon monoxide are mainly emitted from combustion sources, particularly diesel and, gasoline engines, manufacturing industry and power plants. During the lockdown period all of these sectors had reduced operation, contributing to a decrease in environmental pollutants.(6) NASA satellite images show a dramatic drop in air pollution during the lockdown period compared to previous years. March 2020 showed the lowest NO<sub>2</sub> monthly atmospheric level of any March since 2015 (Figure 1).



1  
2  
3 While the human and economic costs of the COVID-19 pandemic are devastating, we are  
4 witnessing a significant decrease in the number of PICU admissions, especially those resulting  
5 from respiratory illnesses. It is unclear if this is a temporary reduction or whether this will last  
6 for a longer period as the use of virtual learning and social distancing is encouraged and  
7 renewed emphasis on hand hygiene is incorporated into daily routines. We remain concerned  
8 though that children may not be brought in to seek appropriate medical attention due to the  
9 anxiety related to visiting a health care facility during the pandemic. If that is indeed the case,  
10 then it can certainly have profound short-term and long-term effects on the health of these  
11 children.  
12  
13  
14  
15  
16

## 17 References

- 18  
19  
20 1. Kansagra AP, Goyal MS, Hamilton S, Albers GW. Collateral Effect of Covid-19 on  
21 Stroke Evaluation in the United States. *N Engl J Med*. 2020 Jul 23;383(4):400–1.  
22  
23
- 24 2. Chauhan JC, Slamon NB. The Impact of Multiple Viral Respiratory Infections on  
25 Outcomes for Critically Ill Children. *Pediatr Crit Care Med*. 2017 Aug;18(8):e333–8.  
26  
27
- 28 3. Domínguez Aurrecoechea B, Fernández Francés M, Ordóñez Alonso MÁ, López  
29 Vilar P, Pérez Candás JI, Merino Ramos L, et al. [Infectious diseases and use of  
30 health care resources in children less than 2 years-old who attend kindergarten]. *An*  
31 *Pediatr (Barc)*. 2015 Sep;83(3):149–59.  
32  
33
- 34 4. Yu H-R, Lin C-HR, Tsai J-H, Hsieh Y-T, Tsai T-A, Tsai C-K, et al. A Multifactorial  
35 Evaluation of the Effects of Air Pollution and Meteorological Factors on Asthma  
36 Exacerbation. *Int J Environ Res Public Health*. 2020 Jun 4;17(11).  
37  
38
- 39 5. Crow SS, Undavalli C, Warner DO, Katusic SK, Kandel P, Murphy SL, et al.  
40 Epidemiology of Pediatric Critical Illness in a Population-Based Birth Cohort in  
41 Olmsted County, MN. *Pediatr Crit Care Med*. 2017 Mar;18(3):e137–45.  
42  
43
- 44 6. Mahato S, Pal S, Ghosh KG. Effect of lockdown amid COVID-19 pandemic on air  
45 quality of the megacity Delhi, India. *Sci Total Environ*. 2020 Aug 15;730:139086.  
46  
47  
48  
49  
50  
51  
52  
53  
54  
55  
56  
57  
58  
59  
60

Table 1. PICU Admissions March 1<sup>st</sup>-May 31<sup>st</sup>, 2016-2020

A- Admissions March 1<sup>st</sup>-May 31<sup>st</sup>, 2016-2020 (most common categories)

| Category       | 2015       | 2016       | 2017       | 2018       | 2019       | 2020       |
|----------------|------------|------------|------------|------------|------------|------------|
| Respiratory*   | 134        | 138        | 177        | 133        | 106        | 30         |
| Cardiovascular | 48         | 51         | 34         | 47         | 57         | 56         |
| Endocrine      | 16         | 12         | 12         | 14         | 8          | 7          |
| Neurologic     | 29         | 25         | 16         | 21         | 5          | 6          |
| Other          | 81         | 73         | 70         | 60         | 19         | 2          |
| <b>Total</b>   | <b>308</b> | <b>299</b> | <b>309</b> | <b>275</b> | <b>195</b> | <b>101</b> |

\* Planned surgical procedures excluded from the analysis

B-Respiratory diagnosis, March 1<sup>st</sup>-May 31<sup>st</sup>, 2016-2020

| Respiratory Diagnosis | 2015 | 2016 | 2017 | 2018 | 2019 | 2020 | Total |
|-----------------------|------|------|------|------|------|------|-------|
|                       |      |      |      |      |      |      |       |

|                           |            |            |            |            |            |           |            |
|---------------------------|------------|------------|------------|------------|------------|-----------|------------|
| <b>Status asthmaticus</b> | 69         | 76         | 81         | 72         | 51         | 6         | 355        |
| <b>Bronchiolitis</b>      | 26         | 24         | 39         | 31         | 29         | 8         | 157        |
| <b>Pneumonia</b>          | 23         | 24         | 25         | 14         | 15         | 4         | 105        |
| <b>Croup</b>              | 5          | 5          | 8          | 1          | 4          | 0         | 23         |
| <b>Tracheitis</b>         | 4          | 3          | 9          | 7          | 3          | 3         | 29         |
| <b>Other*</b>             | 7          | 6          | 15         | 8          | 4          | 9         | 49         |
| <b>Total</b>              | <b>134</b> | <b>138</b> | <b>177</b> | <b>133</b> | <b>106</b> | <b>30</b> | <b>718</b> |

\*Other: acute chest syndrome, congenital lung malformation, obstructive sleep apnea, subglottic cyst, subglottic stenosis, aspiration pneumonitis, asphyxia.

### Figure 1

NASA satellite measurements revealed significant reductions in air pollution over major metropolitan areas of the Northeast United States

**Panel A:** average NO<sub>2</sub> concentrations in March 2015-2019.

**Panel B:** average NO<sub>2</sub> concentrations in March 2020 during the strict lockdown period.

Source:

NASA Aura: <https://aura.gsfc.nasa.gov>

1  
2  
3  
4  
5  
6  
7  
8  
9  
10  
11  
12  
13  
14  
15  
16  
17  
18  
19  
20  
21  
22  
23  
24  
25  
26  
27  
28  
29  
30  
31  
32  
33  
34  
35  
36  
37  
38  
39  
40  
41  
42  
43  
44  
45  
46  
47  
48  
49  
50  
51  
52  
53  
54  
55  
56  
57  
58  
59  
60

Confidential: For Review Only

1  
2  
3  
4  
5  
6  
7  
8  
9  
10  
11  
12  
13  
14  
15  
16  
17  
18  
19  
20  
21  
22  
23  
24  
25  
26  
27  
28  
29  
30  
31  
32  
33  
34  
35  
36  
37  
38  
39  
40  
41  
42  
43  
44  
45  
46  
47  
48  
49  
50  
51  
52  
53  
54  
55  
56  
57  
58  
59  
60



Supplement: bmjpo-2020-000876.draft_revisions.pdf [file bmjpo-2020-000876.draft_revisions.pdf]
